# Supplementary material for: The evolutionary history and genomics of European blackcap migration
Source: eLife. 2020 Apr 21;9:e54462. doi: 10.7554/eLife.54462 (PMC7173969; doi:10.7554/eLife.54462)
Supplement: Supplementary file 4. [file elife-54462-supp4.xlsx]

## Sheet: Table S4
Table S4. Samples used in the present study, including their locations and details on how phenotypes were determined.
							birds used in analyses of migrations' genetic basis
phenotype	lat	long	bird	location	additional_location_info	additional_phenotype_info	full analysis	orientation analysis	distance analysis
resident island	38.76	-27.25	A270577	Azores / Terceira	Malha Verde	sampled on island, juveniles (EURING 3)
resident island	38.76	-27.25	A270584	Azores / Terceira	Malha Verde	sampled on island, juveniles (EURING 3)
resident island	38.76	-27.25	A270589	Azores / Terceira	Malha Verde	sampled on island, juveniles (EURING 3)
resident island	38.76	-27.25	A270591	Azores / Terceira	Malha Verde	sampled on island, juveniles (EURING 3)
resident island	38.76	-27.25	A270598	Azores / Terceira	Malha Verde	sampled on island, juveniles (EURING 3)
resident island	28.55	-17.79	1N23588	Canary Islands / La Palma	Aerogeneradores de Mazo	sampled on island as breeding bird (EURING 4)
resident island	28.55	-17.79	1N23590	Canary Islands / La Palma	Aerogeneradores de Mazo	sampled on island as breeding bird (EURING 4)
resident island	28.64	-17.79	N968342	Canary Islands / La Palma	San JosÌ©	sampled on island as breeding bird (EURING 4)
resident island	28.55	-17.79	N968352	Canary Islands / La Palma	La Caldereta	sampled on island as breeding bird (EURING 4)
resident island	28.72	-17.79	2N96596	Canary Islands / La Palma	Sauceda	sampled on island as fledgling (EURING 3)
resident island	15.15	-23.86	CAVE7	Cape Verde	Santiago	sampled on island as breeding bird (EURING 4)
resident island	15.15	-23.86	CAVE9	Cape Verde	Santiago	sampled on island as breeding bird (EURING 4)
resident island	15.15	-23.86	CAVE13	Cape Verde	Fogo	sampled on island as breeding bird (EURING 4)
resident island	15.15	-23.86	CAVE22	Cape Verde	Santiago	sampled on island as breeding bird (EURING 4)
resident island	15.15	-23.86	CAVE27	Cape Verde	Santiago	sampled on island as breeding bird (EURING 4)
resident continent	36.16	-5.58	UCM064	Spain	Gibraltar	ringing recovery data and discriminant functions based on morphology	x
resident continent	36.16	-5.58	UCM066	Spain	Gibraltar	ringing recovery data and discriminant functions based on morphology	x
resident continent	36.16	-5.58	UCM067	Spain	Gibraltar	ringing recovery data and discriminant functions based on morphology	x
resident continent	36.16	-5.58	UCM071	Spain	Gibraltar	ringing recovery data and discriminant functions based on morphology	x
resident continent	36.16	-5.58	UCM075	Spain	Gibraltar	ringing recovery data and discriminant functions based on morphology	x
resident continent	36.16	-5.58	UCM076	Spain	Gibraltar	ringing recovery data and discriminant functions based on morphology	x
resident continent	36.16	-5.58	UCM077	Spain	Gibraltar	ringing recovery data and discriminant functions based on morphology	x
resident continent	36.16	-5.58	UCM081	Spain	Gibraltar	ringing recovery data and discriminant functions based on morphology	x
resident continent	36.16	-5.58	UCM083	Spain	Gibraltar	ringing recovery data and discriminant functions based on morphology	x
resident continent	36.16	-5.58	UCM084	Spain	Gibraltar	ringing recovery data and discriminant functions based on morphology	x
resident continent	37.94	-5.73	UCM143	Spain	Cazalla de la Sierra	ringing recovery data and discriminant functions based on morphology
resident continent	37.94	-5.73	UCM145	Spain	Cazalla de la Sierra	ringing recovery data and discriminant functions based on morphology
resident continent	37.94	-5.73	UCM148	Spain	Cazalla de la Sierra	ringing recovery data and discriminant functions based on morphology
resident continent	37.94	-5.73	UCM149	Spain	Cazalla de la Sierra	ringing recovery data and discriminant functions based on morphology
resident continent	37.94	-5.73	UCM150	Spain	Cazalla de la Sierra	ringing recovery data and discriminant functions based on morphology
resident continent	37.94	-5.73	UCM151	Spain	Cazalla de la Sierra	ringing recovery data and discriminant functions based on morphology
resident continent	37.94	-5.73	UCM153	Spain	Cazalla de la Sierra	ringing recovery data and discriminant functions based on morphology
resident continent	37.94	-5.73	UCM154	Spain	Cazalla de la Sierra	ringing recovery data and discriminant functions based on morphology
resident continent	37.94	-5.73	UCM155	Spain	Cazalla de la Sierra	ringing recovery data and discriminant functions based on morphology
resident continent	37.94	-5.73	UCM160	Spain	Cazalla de la Sierra	ringing recovery data and discriminant functions based on morphology
resident continent	31.26	-7.97	1204	Morocco	Asni	sampled as breeding bird (EURING 4)
resident continent	31.26	-7.97	1206	Morocco	Asni	sampled as breeding bird (EURING 4)
resident continent	31.26	-7.97	1219	Morocco	Asni	sampled as breeding bird (EURING 4)
short dist SW	42.89	-2.52	UCM094	Spain	Alava	migrants as breeding sites have no birds during winte, ringing recoveries point to winterint sites in southern Spain	x		x
short dist SW	42.89	-2.52	UCM095	Spain	Alava	migrants as breeding sites have no birds during winte, ringing recoveries point to winterint sites in southern Spain	x		x
short dist SW	42.89	-2.52	UCM096	Spain	Alava	migrants as breeding sites have no birds during winte, ringing recoveries point to winterint sites in southern Spain	x		x
short dist SW	42.89	-2.52	UCM097	Spain	Alava	migrants as breeding sites have no birds during winte, ringing recoveries point to winterint sites in southern Spain	x		x
short dist SW	42.89	-2.52	UCM099	Spain	Alava	migrants as breeding sites have no birds during winte, ringing recoveries point to winterint sites in southern Spain	x		x
short dist SW	40.57	-4.16	UCM117	Spain	Guadarrama	migrants as breeding sites have no birds during winte, ringing recoveries point to winterint sites in southern Spain	x		x
short dist SW	40.57	-4.16	UCM123	Spain	Guadarrama	migrants as breeding sites have no birds during winte, ringing recoveries point to winterint sites in southern Spain	x		x
short dist SW	40.57	-4.16	UCM137	Spain	Guadarrama	migrants as breeding sites have no birds during winte, ringing recoveries point to winterint sites in southern Spain	x		x
short dist SW	40.57	-4.16	UCM139	Spain	Guadarrama	migrants as breeding sites have no birds during winte, ringing recoveries point to winterint sites in southern Spain	x		x
short dist SW	40.57	-4.16	UCM114	Spain	Guadarrama	migrants as breeding sites have no birds during winte, ringing recoveries point to winterint sites in southern Spain	x		x
med dist NW	48.03	1982-07-01	9034	Germany	Freiburg; Mooswald (breeding)	isotope data, morphometrics, ringing recovery data record	x	x	x
med dist NW	48.03	1982-07-01	9029	Germany	Freiburg; Mooswald (breeding)	isotope data, morphometrics, ringing recovery data record	x	x	x
med dist NW	48.03	1982-07-01	9033	Germany	Freiburg; Mooswald (breeding)	isotope data, morphometrics, ringing recovery data record	x	x	x
med dist NW	48.03	1982-07-01	9030	Germany	Freiburg; Mooswald (breeding)	isotope data, morphometrics, ringing recovery data record	x	x	x
med dist NW	48.03	1982-07-01	9175	Germany	Freiburg; Mooswald (breeding)	isotope data, morphometrics, ringing recovery data record	x	x	x
med dist NW	53.30	-6.52	DU08	Ireland	Dublin (wintering)	birds sampled on their UK wintering grounds	x	x	x
med dist NW	51.88	-3.99	EN01	United Kingdom	Plymouth (wintering)	birds sampled on their UK wintering grounds	x	x	x
med dist NW	51.88	-3.99	EN08	United Kingdom	Brean (wintering)	birds sampled on their UK wintering grounds	x	x	x
med dist NW	51.88	-3.99	BRN10	United Kingdom	Brean (wintering)	birds sampled on their UK wintering grounds	x	x	x
med dist NW	51.88	-3.99	BRN05	United Kingdom	Brean (wintering)	birds sampled on their UK wintering grounds	x	x	x
med dist NW	51.75	-1.32	bcUK	United Kingdom	Oxford (wintering)	birds sampled on their UK wintering grounds	x	x	x
med dist NW	48.03	1982-07-01	9201	Germany	Freiburg; Mooswald (breeding)	isotope data, morphometrics, ringing recovery data record	x	x	x
med dist NW	48.03	1982-07-01	9078	Germany	Freiburg; Mooswald (breeding)	isotope data, morphometrics, ringing recovery data record	x	x	x
med dist NW	48.03	1982-07-01	9239	Germany	Freiburg; Mooswald (breeding)	isotope data, morphometrics, ringing recovery data record	x	x	x
med dist NW	48.03	1982-07-01	9042	Germany	Freiburg; Mooswald (breeding)	isotope data, morphometrics, ringing recovery data record	x	x	x
med dist SW	48.03	1982-07-01	9194	Germany	Freiburg; Mooswald	isotope data, morphometrics, ringing recovery data record	x	x	x
med dist SW	48.03	1982-07-01	9106	Germany	Freiburg; Mooswald	isotope data, morphometrics, ringing recovery data record	x	x	x
med dist SW	48.03	1982-07-01	9130	Germany	Freiburg; Mooswald	isotope data, morphometrics, ringing recovery data record	x	x	x
med dist SW	48.03	1982-07-01	9176	Germany	Freiburg; Mooswald	isotope data, morphometrics, ringing recovery data record	x	x	x
med dist SW	48.03	1982-07-01	9138	Germany	Freiburg; Mooswald	isotope data, morphometrics, ringing recovery data record	x	x	x
med dist SW	48.03	1982-07-01	9073	Germany	Freiburg; Mooswald	isotope data, morphometrics, ringing recovery data record	x	x	x
med dist SW	48.03	1982-07-01	9167	Germany	Freiburg; Mooswald	isotope data, morphometrics, ringing recovery data record	x	x	x
med dist SW	48.03	1982-07-01	9244	Germany	Freiburg; Mooswald	isotope data, morphometrics, ringing recovery data record	x	x	x
med dist SW	48.03	1982-07-01	9179	Germany	Freiburg; Mooswald	isotope data, morphometrics, ringing recovery data record	x	x	x
med dist SW	48.03	1982-07-01	9123	Germany	Freiburg; Mooswald	isotope data, morphometrics, ringing recovery data record	x	x	x
med dist SW	47.16	1996-08-01	UCM012	Germany	Radolfzell, Baden-WÌ_rttemberg	population ringing recovery data, sampled as breeding bird (EURING 4)	x	x	x
med dist SW	47.16	1996-08-01	UCM014	Germany	Radolfzell, Baden-WÌ_rttemberg	population ringing recovery data, sampled as breeding bird (EURING 4)	x	x	x
med dist SW	47.16	1996-08-01	UCM016	Germany	Radolfzell, Baden-WÌ_rttemberg	population ringing recovery data, sampled as breeding bird (EURING 4)	x	x	x
med dist SW	47.16	1996-08-01	UCM017	Germany	Radolfzell, Baden-WÌ_rttemberg	population ringing recovery data, sampled as breeding bird (EURING 4)	x	x	x
med dist SW	47.16	1996-08-01	UCM018	Germany	Radolfzell, Baden-WÌ_rttemberg	population ringing recovery data, sampled as breeding bird (EURING 4)	x	x	x
med dist SW	50.24	2019-04-03	UCM051	Belgium	Meaurain	population ringing recovery data, sampled as breeding bird (EURING 4)	x	x	x
med dist SW	50.24	2019-04-03	UCM053	Belgium	St. Waast	population ringing recovery data, sampled as breeding bird (EURING 4)	x	x	x
med dist SW	50.24	2019-04-03	UCM056	Belgium	Foret de Mormal	population ringing recovery data, sampled as breeding bird (EURING 4)	x	x	x
med dist SW	50.24	2019-04-03	UCM057	Belgium	Foret de Mormal	population ringing recovery data, sampled as breeding bird (EURING 4)	x	x	x
med dist SW	50.24	2019-04-03	UCM059	Belgium	Foret de Mormal	population ringing recovery data, sampled as breeding bird (EURING 4)	x	x	x
med dist SW	50.24	2019-04-03	UCM060	Belgium	Foret de Mormal	population ringing recovery data, sampled as breeding bird (EURING 4)	x	x	x
med dist SW	50.24	2019-04-03	UCM061	Belgium	Tete Noire (Foret de Mormal)	population ringing recovery data, sampled as breeding bird (EURING 4)	x	x	x
med dist SW	50.24	2019-04-03	UCM063	Belgium	Angre	population ringing recovery data, sampled as breeding bird (EURING 4)	x	x	x
med dist SW	50.24	2019-04-03	UCM052	Belgium	Meaurain	population ringing recovery data, sampled as breeding bird (EURING 4)	x	x	x
med dist SE	48.05	16.39	8201	Austria	Kefermarkt	isotope data, Ringed in Kefermarkt, AT Spring 2010; recovered in Hungary Spring 2011	x	x	x
med dist SE	52.7	23.87	9357	Poland	Bialowieza	isotope data, morphometrics, ringing recovery data record	x	x	x
med dist SE	52.7	23.87	9384	Poland	Bialowieza	isotope data, morphometrics, ringing recovery data record	x	x	x
med dist SE	52.7	23.87	9380	Poland	Bialowieza	isotope data, morphometrics, ringing recovery data record	x	x	x
med dist SE	52.7	23.87	9350	Poland	Bialowieza	isotope data, morphometrics, ringing recovery data record	x	x	x
med dist SE	48.01	16.47	UCM001	Austria	Bruck/Leitha, Burgenland	population ringing recovery data, sampled as breeding bird (EURING 4)	x	x	x
med dist SE	48.01	16.47	UCM005	Austria	Bruck/Leitha, Burgenland	population ringing recovery data, sampled as breeding bird (EURING 4)	x	x	x
med dist SE	48.01	16.47	UCM007	Austria	Bruck/Leitha, Burgenland	population ringing recovery data, sampled as breeding bird (EURING 4)	x	x	x
med dist SE	48.01	16.47	UCM008	Austria	Bruck/Leitha, Burgenland	population ringing recovery data, sampled as breeding bird (EURING 4)	x	x	x
med dist SE	48.01	16.47	UCM010	Austria	Bruck/Leitha, Burgenland	population ringing recovery data, sampled as breeding bird (EURING 4)	x	x	x
med dist SE	48.02	16.47	UCM003	Austria	Bruck/Leitha, Burgenland	population ringing recovery data, sampled as breeding bird (EURING 4)	x	x	x
med dist SE	48.02	16.47	UCM009	Austria	Bruck/Leitha, Burgenland	population ringing recovery data, sampled as breeding bird (EURING 4)	x	x	x
med dist SE	48.22	16.29	TO12755	Austria	Vienna	population ringing recovery data, sampled as breeding bird (EURING 4)	x	x	x
med dist SE	48.22	16.29	TO12753	Austria	Vienna	population ringing recovery data, sampled as breeding bird (EURING 4)	x	x	x
med dist SE	48.22	16.29	TO12756	Austria	Vienna	population ringing recovery data, sampled as breeding bird (EURING 4)	x	x	x
long dist SE	55.41	13.28	UCM048	Sweden	Lund, Krankesjon	population ringing recovery data, sampled as breeding bird (EURING 4)	x		x
long dist SE	55.41	13.28	UCM049	Sweden	Lund, Krankesjon	population ringing recovery data, sampled as breeding bird (EURING 4)	x		x
long dist SE	55.41	13.28	UCM046	Sweden	Lund, Krankesjon	population ringing recovery data, sampled as breeding bird (EURING 4)	x		x
long dist SE	58.90	17.92	20166912	Sweden	Ìãlviken, NynÌ_shamm (on migration)	sampled during autumn migration, long distance migrants selected based on long wings	x		x
long dist SE	58.95	17.15	20166913	Sweden	Tovetorp (on migration)	sampled during autumn migration, long distance migrants selected based on long wings	x		x
long dist SE	58.95	17.15	20166915	Sweden	Tovetorp (on migration)	sampled during autumn migration, long distance migrants selected based on long wings	x		x
long dist SE	58.49	18.3	20116265	Sweden	Akersberga, Stockholm (on migration)	sampled during autumn migration, long distance migrants selected based on long wings	x		x
long dist SE	60.80	2019-03-15	20116312	Sweden	Leksand, Dalarna (on migration)	sampled during autumn migration, long distance migrants selected based on long wings	x		x
Sylvia borin			GW01	Spain	Pradoluengo (BU)	sampled as breeding bird (EURING 4)
Sylvia borin			GW03	Spain	Barrundia (VI)	sampled as breeding bird (EURING 4)
Sylvia borin			GW04	Spain	Vilar de Barrio (OR)	sampled as breeding bird (EURING 4)
Sylvia borin			GW07	Spain	Jaca (HU)	sampled as breeding bird (EURING 4)
Sylvia borin			GW09	Spain	Jaca (HU)	sampled as breeding bird (EURING 4)
Sylvia abyssinica			4088	Kenya	Aberdare Mts	sampled as breeding bird (EURING 4)
Sylvia abyssinica			4089	Kenya	Aberdare Mts	sampled as breeding bird (EURING 4)
Sylvia abyssinica			4090	Kenya	Udzungwa Forest	sampled as breeding bird (EURING 4)
