# Supplementary material for: The evolutionary history and genomics of European blackcap migration
Source: eLife. 2020 Apr 21;9:e54462. doi: 10.7554/eLife.54462 (PMC7173969; doi:10.7554/eLife.54462)
Supplement: Supplementary file 5. — Estimates of nSL are shown (bolded if in top 1% of values, bolded and italicised if in the top 5%). [file elife-54462-supp5.xlsx]

## Sheet: Table S4a
	Table S5. Extension of Table 1 showing regions identified by hapFLK as being under selection but including the number of causal SNPs identified by CAVIAR and their location within genes. Estimates of nSL are shown (bolded if in top 1% of values, bolded and italisized if in top 5%).
						nSL
	scaf	chr	start	end	# causal SNPs	long_se	med_nw	med_sw	med_se	short_sw	res
1	12	4A	8130995	8145054	3 (intron)	0.76176	0.904211	1.56667	1.23356	1.05008	2.16151
2	13	11	10851009	10880204	2 (intron KARS)	0.825395	1.14324	1.08637	0.925201	0.630003	2.32639
3	17	3	21593823	21601433	4	0.751255	0.830485	0.999849	0.871359	1.46555	1.45447
4	22	9	13359369	13413259	2 (intron)	1.7086	1.09542	0.974576	1.5735	0.729168	0.656675
5	30	2	46978813	46992569	3	1.26785	0.988311	1.20407	1.36367	0.918611	1.94162
6	30	2	96628236	96636138	3	0.769736	1.1478	1.10975	0.740309	0.81081	3.2115
7	41	8	7122918	7133259	3	0.528823	0.700731	0.841471	0.764889	0.796105	1.64083
8	46	1A	15708471	15708883	2	0.893745	1.20373	1.26295	0.815243	1.70548	0.878283
9	99	3	115869	129009	2 (intron TTBK1)	2.63022	1.21	0.921106	0.542051	0.956582	1.63298
	Super-Scaffold_67			11464691

## Sheet: Table S4b
					nSL
scaf	chr	start	end	causal SNPs	med_nw	med_sw	med_se
17	3	63601837	63605095	2 (intron SDC1)	1.5033	0.808869	0.961594
30	2	34247172	34247483	1	1.54188	0.744748	0.950807
46	1A	10318254	10318715	3	1.00817	1.27971	0.963814
63	1A	4048586	4049674	3	0.707301	0.453401	1.14842
67	6	12616850	12617845	2	1.23628	0.614988	1.36981
73	5	2594650	2598261	4 (intron BDKRB2)	0.877567	1.15118	1.3843
